# Supplementary material for: CDK4/6 inhibitors sensitize gammaherpesvirus-infected tumor cells to T-cell killing by enhancing expression of immune surface molecules
Source: Springer Nature journal article supplement (doi:10.1186/s12967-022-03400-z), 2022-05-13

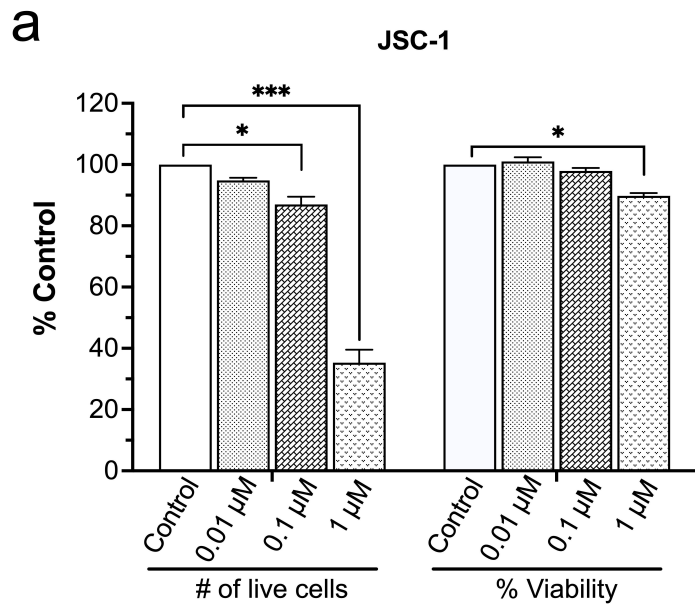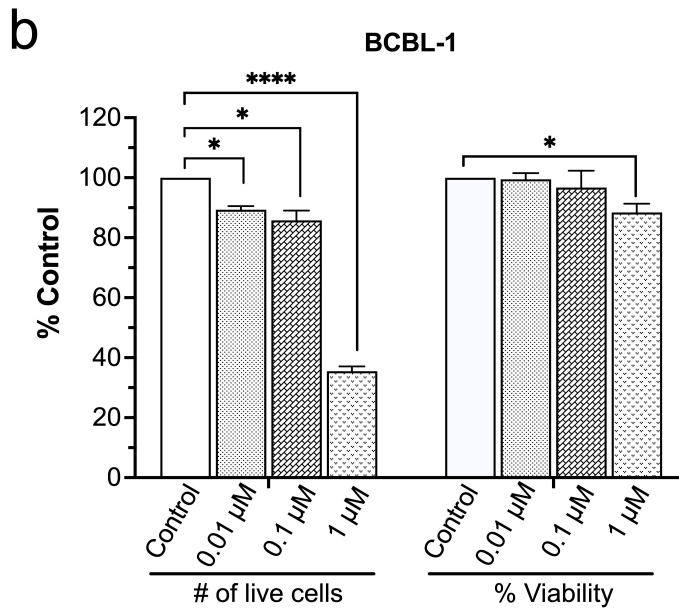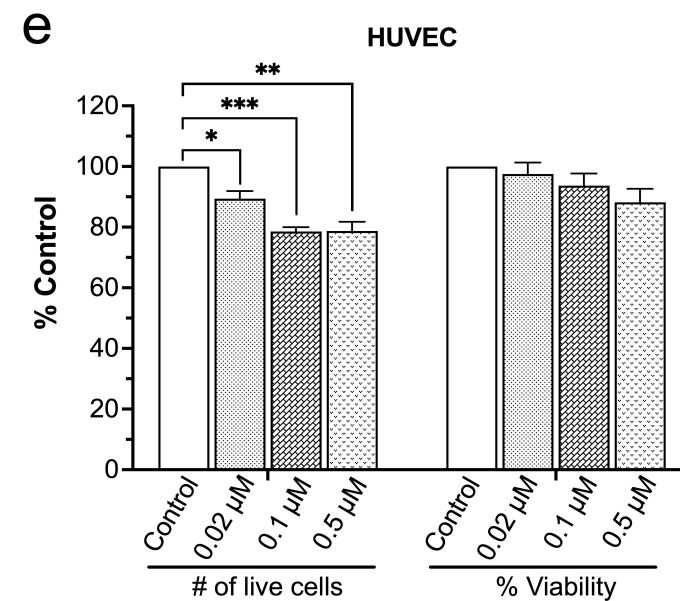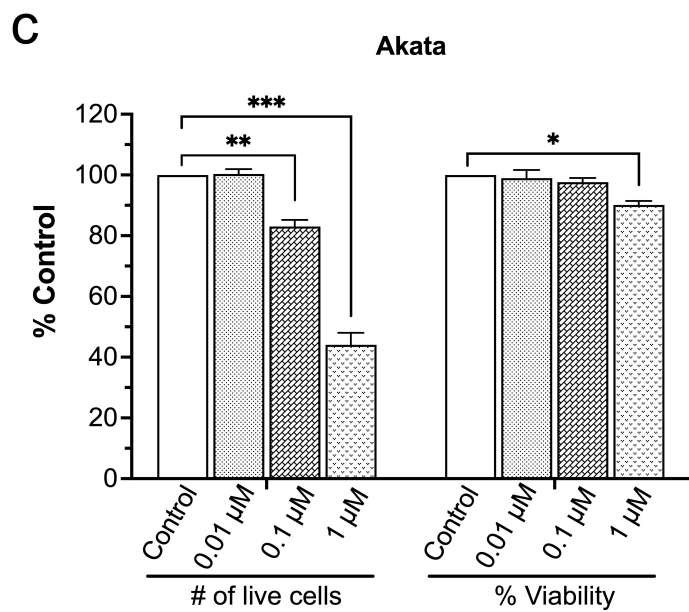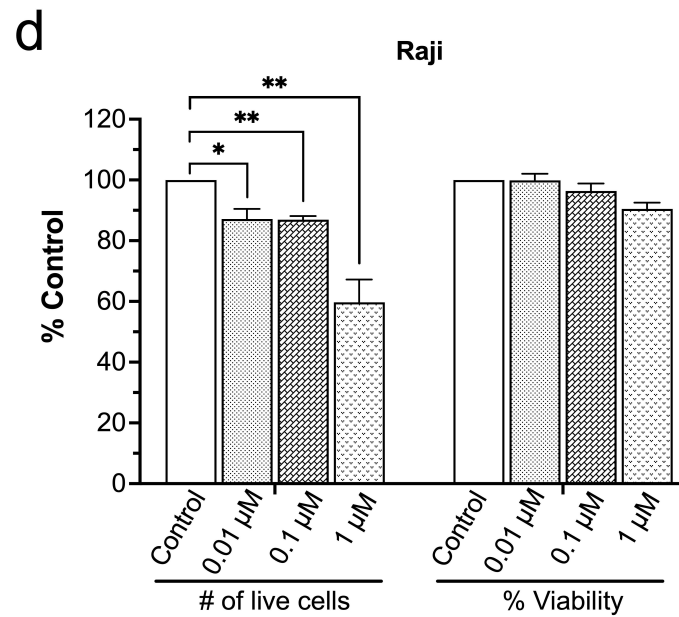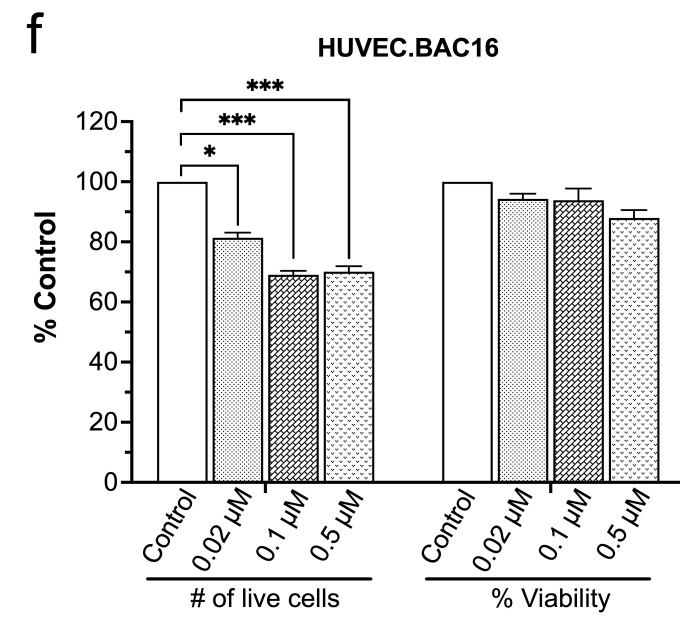

Supplement: MOESM3 [file 20400186]
