# Supplementary material for: CDK4/6 inhibitors sensitize gammaherpesvirus-infected tumor cells to T-cell killing by enhancing expression of immune surface molecules
Source: Springer Nature journal article supplement (doi:10.1186/s12967-022-03400-z), 2022-05-13

**a**

JSC-1

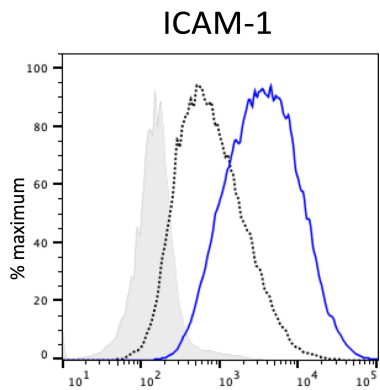

B7-2

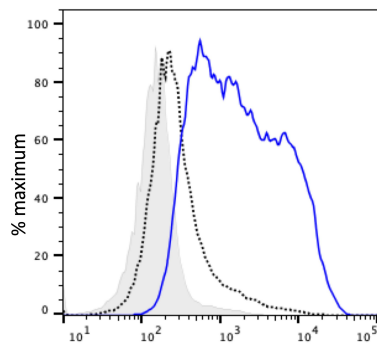

PD-L1

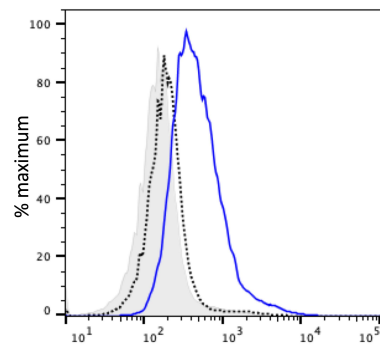

Isotype  
 Control  
 1µM Abe

**b**

BCBL-1

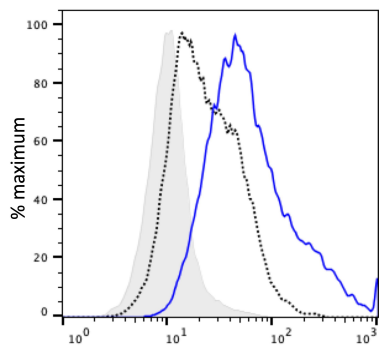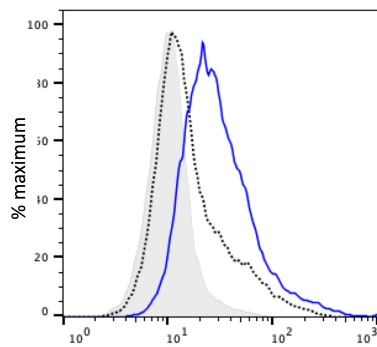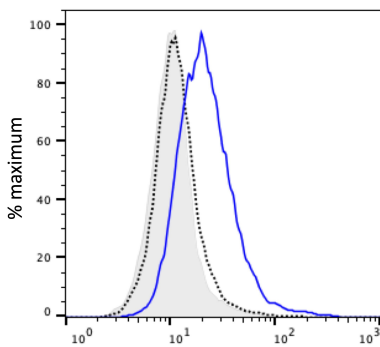**c**

Akata

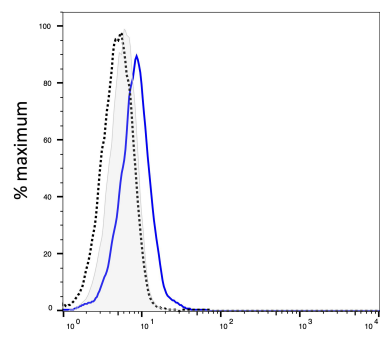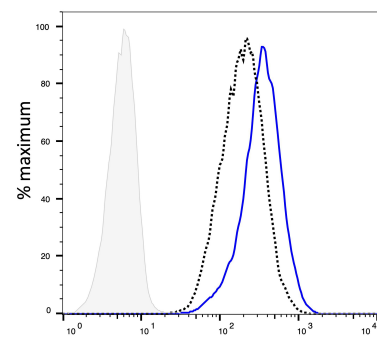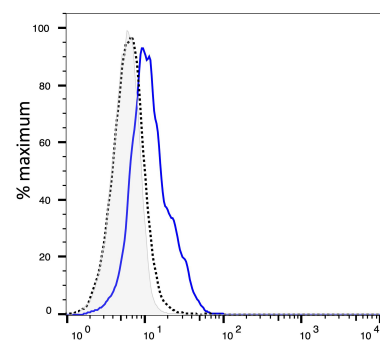**d**

Raji

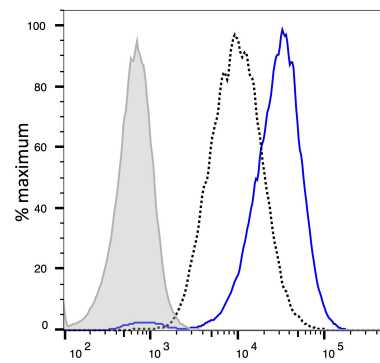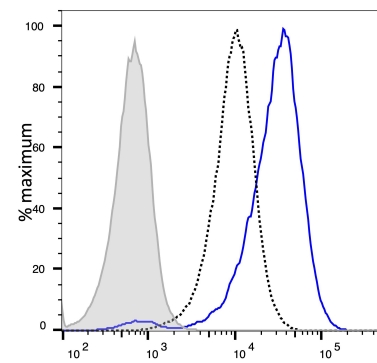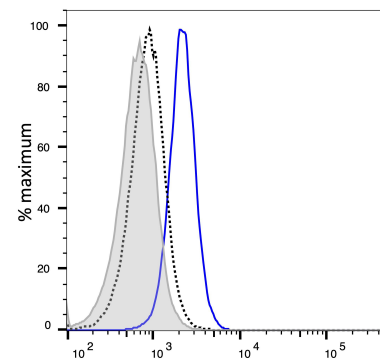

Supplement: MOESM5 [file 20400186]
