# Supplementary material for: CDK4/6 inhibitors sensitize gammaherpesvirus-infected tumor cells to T-cell killing by enhancing expression of immune surface molecules
Source: Springer Nature journal article supplement (doi:10.1186/s12967-022-03400-z), 2022-05-13
Supplement: MOESM6 [file 20400186]

1<sup>st</sup> Exp.

Normalized to Mode

HUVEC

HUVEC.BAC16

- Isotype Ab
- ⋯ Control
- 1 $\mu$ M Abe
- 1 $\mu$ M Pal
- 5 $\mu$ M Rib

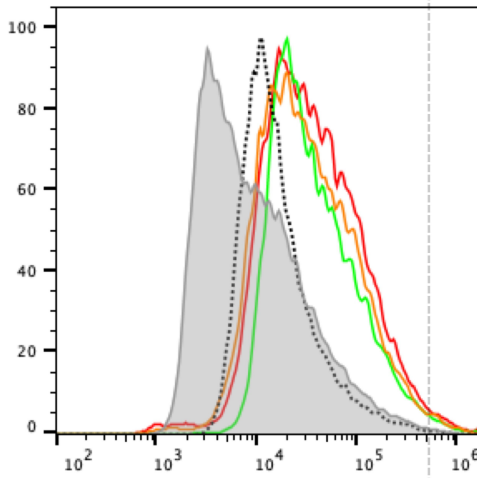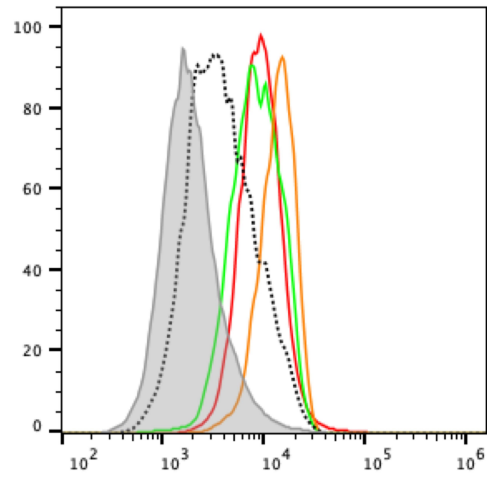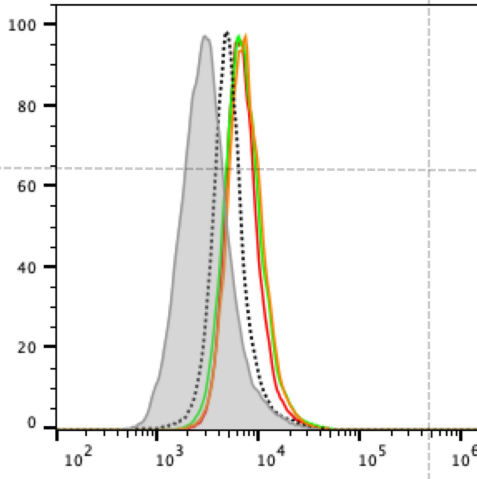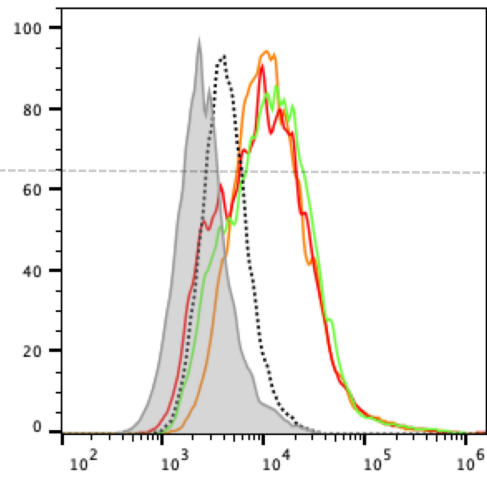

3<sup>rd</sup> Exp.

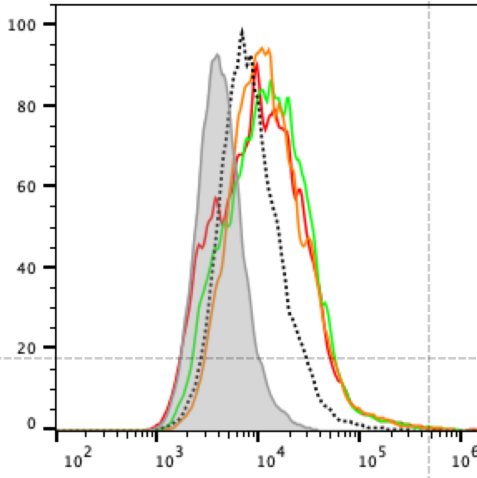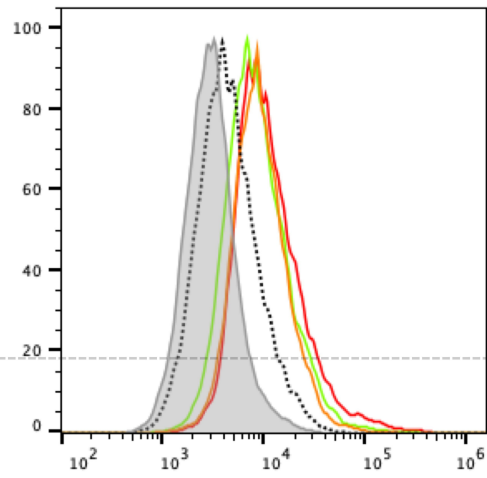

B7-2
