# Supplementary material for: CDK4/6 inhibitors sensitize gammaherpesvirus-infected tumor cells to T-cell killing by enhancing expression of immune surface molecules
Source: Springer Nature journal article supplement (doi:10.1186/s12967-022-03400-z), 2022-05-13
Supplement: MOESM8 [file 20400186]

## Primers used for RT-qPCR

| <b>Gene Name</b>               | <b>Forward Primer Sequence (5' to 3')</b> | <b>Reverse Primer Sequence (5' to 3')</b> |
|--------------------------------|-------------------------------------------|-------------------------------------------|
| <i>ORF73</i> (LANA)            | CGCGAATACCGCTATGTACTCA                    | GGAACGCGCCTCATACGA                        |
| <i>ORF50</i> (RTA)             | TTGCCAAGTTTGTACAACCTGCT                   | ACCTTGCAAAGACCATTTCAGAT                   |
| <i>K2</i> (vIL6)               | CTGTTACCGTACCGGCATCT                      | GGGTGGACTGTAGTGCGTCT                      |
| <i>ORF45</i>                   | TCGTGAACCAATCCCAGCCAAG                    | TCCACCCAGTTTGAGAAGCATC                    |
| <i>ORF57</i>                   | CATCCTAGAGGACTCTGT                        | TTGCTCGTCTTCCAGTGT                        |
| <i>EBER2</i>                   | GGACAGCCGTTGCCCTAGTGG                     | AGCGGACAAGCCGAATACCCTTC                   |
| <i>BMRF1</i>                   | CGTGCCAATCTTGAGGTTTT                      | CGGAGGCGTGGTTAAATAAA                      |
| <i>ACTB</i>                    | CCTTCCTGGGCATGGAGT                        | CAGGGCAGTGATCTCCTTCT                      |
| <i>HLA</i>                     | GAGATCACACTGACCTGGCA                      | GAACCTTCCAGAAGTGGG                        |
| <i>CD54</i>                    | AGCGGCTGACGTGTGCAGTAAT                    | TCTGAGACCTCTGGCTTCGTCA                    |
| <i>CD86</i>                    | CCATCAGCTTGTCTGTTTCATTCC                  | GCTGTAATCCAAGGAATGTGGTC                   |
| <i>CD274</i>                   | TGCCGACTACAAGCGAATTACTG                   | CTGCTTGTCCAGATGACTTCGG                    |
| <i>DDX58</i>                   | TGTGCTCCTACAGGTTGTGGA                     | CACTGGGATCTGATTCGCAAAA                    |
| <i>DNMT1</i>                   | CCTAGCCCCAGGATTACAAGG                     | ACTCATCCGATTTGGCTCTTTC                    |
| <i>ERV3-1</i>                  | TACGTGGTCGGGGAACATCAT                     | GGTCACAGACTGAGTAGGTTGT                    |
| <i>IFIT1</i>                   | GCGCTGGGTATGCGATCTC                       | CAGCCTGCCTTAGGGGAAG                       |
| <i>IFNL2</i>                   | ACGCGAGACCTGAATTGTGT                      | AGCGACTGGGTGGCAATAAA                      |
| <i>NLRC5</i>                   | GCTCGGCAACAAGAACCTGT                      | GGTCCAAGGTCTCGTTCCT                       |
| <i>OAS2</i>                    | GGAGCTTCCTGATTGGCAGA                      | ATGTAGGGTGGCAAGCACTG                      |
| <i>STAT1</i>                   | CAGCTTGACTCAAATTCCTGGA                    | TGAAGATTACGCTTGCTTTTCCT                   |
| <i>IFN-<math>\alpha</math></i> | GACTCCATCTTGGCTGTGA                       | TGATTTCTGCTCTGACAACCT                     |
| <i>IFN-<math>\beta</math></i>  | CTTGATTCTTACAAAGAAGCAGC                   | TCCTCCTTCTGGAAGTCTGCA                     |
| <i>IFN-<math>\gamma</math></i> | GAGTGTGGAGACCATCAAGGAAG                   | TGCTTTGCGTTGGACATTCAAGTC                  |
